# Supplementary material
Source: PubMed Central journal article supplement (PMC3511138)
Supplement: 1209823109_pnas.201209823SI.pdf [file 1209823109_pnas.201209823SI.pdf]

# Supporting Information

Babbitt et al. 10.1073/pnas.1209823109

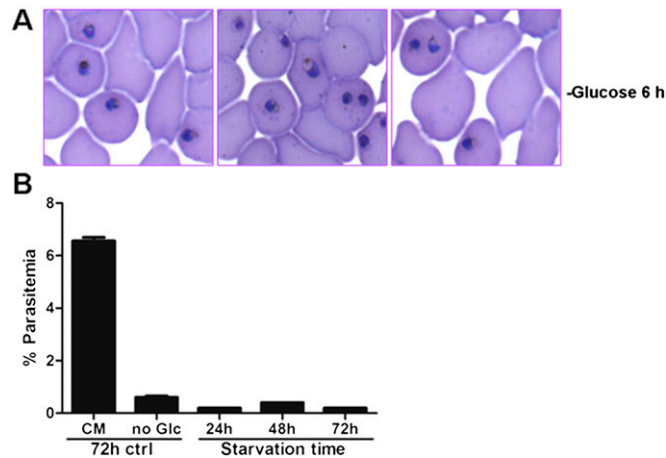

**Fig. S1.** Glucose-starved parasites do not recover growth. (A) Representative images of Giemsa-stained thin blood smears prepared from parasites incubated in glucose-free medium for 6 h. (B) Growth recovery following glucose resupplementation of parasites starved for indicated times. A control set of parasites was fed (complete medium, CM) or glucose starved (no Glc) for 72 h. Parasitemia of all cultures was measured by flow cytometry after 72 h of recovery. Data shown represent the mean parasitemia  $\pm$  SEM;  $n = 3$ .

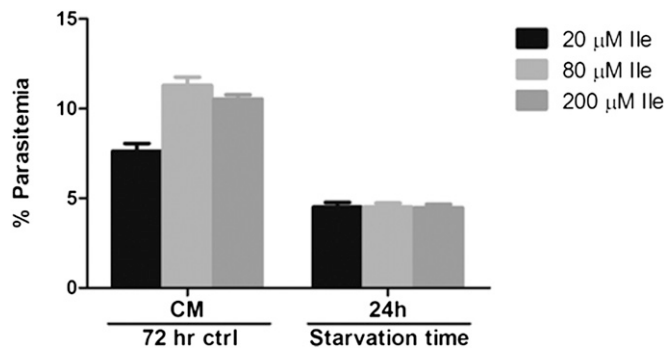

**Fig. S2.** Parasite recovery does not depend on preexisting isoleucine (Ile) stores. Synchronous 3D7 parasites, previously maintained in RPMI medium containing various concentrations of isoleucine, were starved for isoleucine for 24 h and then were resupplemented. Parasitemia of all cultures was measured by flow cytometry after 72 h of recovery. Data shown represent the mean parasitemia  $\pm$  SEM;  $n = 3$ .

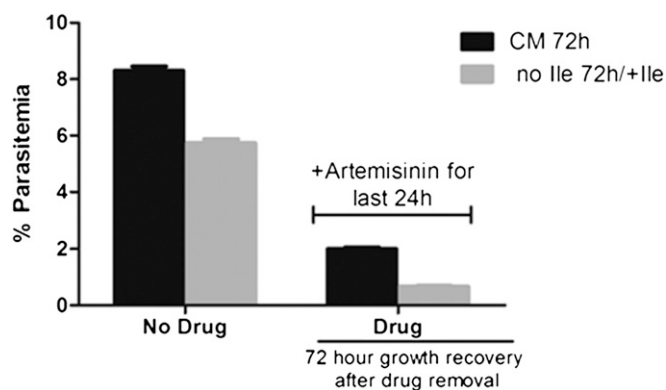

**Fig. S3.** Hibernating parasites remain susceptible to artemisinin. Synchronous 3D7 parasites were fed (black bars) or starved for isoleucine (gray bars) for 72 h with 50 nM artemisinin present for the last 24 h of the incubation. After drug removal, each culture was replated in CM for recovery. A control culture was incubated in the absence of drug for 72 h in CM or isoleucine-free RPMI (no Ile) for 72 h, followed by isoleucine supplementation and recovery. Parasitemia was measured by flow cytometry after 72 h of recovery. Data shown represent the mean parasitemia  $\pm$  SEM;  $n = 3$ .

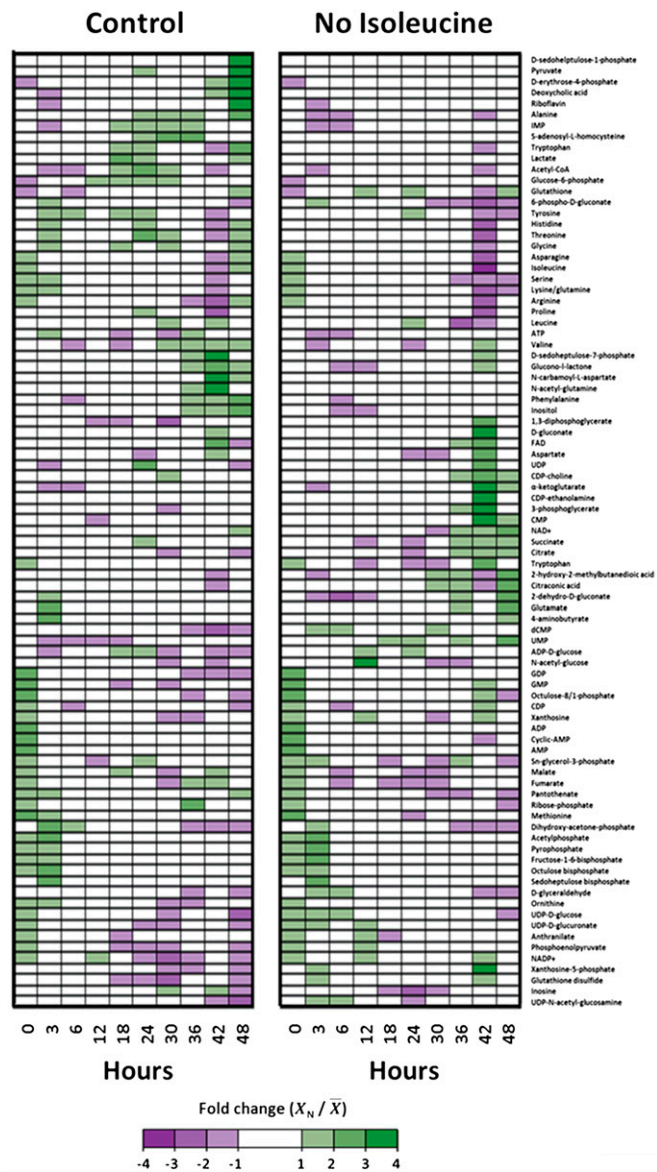

**Fig. S4.** Metabolite profile of infected-erythrocyte cultures under standard and isoleucine-starved conditions. Profiles of 87 intracellular metabolites for 3D7 *Plasmodium falciparum*-infected erythrocytes over 48 h. Infected erythrocytes were cultured under standard conditions (Control) and isoleucine-depleted conditions (No Isoleucine). Relative levels are expressed as the mean-centered ratio of the normalized signal intensity in the infected erythrocyte extract at each time point  $(X_N / \bar{X})$  from two independent replicates.

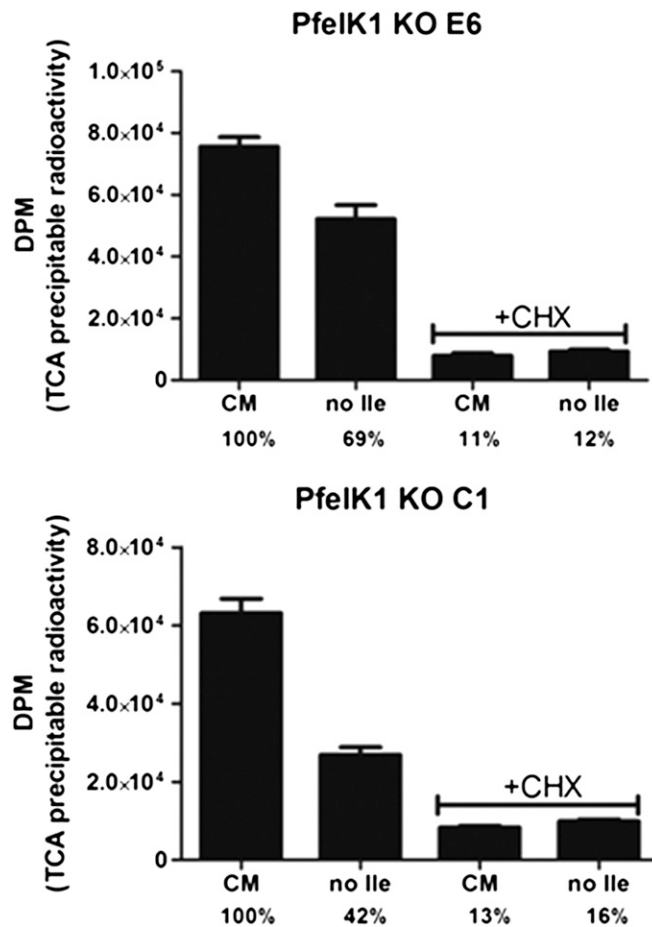

**Fig. 55.** Protein translation is reduced in PfeIK1 mutants during isoleucine starvation. Protein synthesis in starved parasites. Synchronous clonal *pfeik1*<sup>-</sup> parasites were fed or starved for isoleucine for 6 h and labeled with [<sup>35</sup>S]methionine/cysteine for the last hour while incubated in complete (CM) or isoleucine-free (no Ile) labeling RPMI medium in the presence or absence of the protein synthesis inhibitor cycloheximide (CHX). Parasite proteins were tricarboxylic acid (TCA)-precipitated, and the amount of incorporated radioactivity was determined in a scintillation counter. Data shown represent the mean disintegrations per minute (DPM) of incorporated radioactivity ± SEM, *n* = 6.

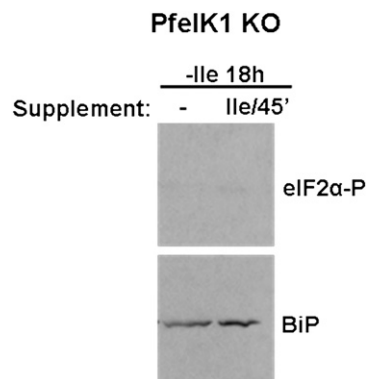

**Fig. 56.** PfeIF2α remains unphosphorylated in PfeIK1-KO parasites during prolonged starvation. Synchronous clonal *pfeik1*<sup>-</sup> parasites were maintained in isoleucine-free RPMI medium for 18 h, followed by resupplementation with isoleucine for 45 min. Parasite lysates were prepared for SDS/PAGE followed by immunoblotting with antibodies against phosphorylated eIF2α (eIF2α-P) and with BiP as a loading control.

Table S1.  $R^2$  correlation of gene expression between fed (+) and isoleucine-starved (-) parasites

|       | 0 h    | 3 h+   | 6 h+   | 12 h+  | 18 h+  | 24 h+  | 30 h+  | 36 h+  | 42 h+  | 48 h+  | 3 h-   | 6 h-   | 12 h-  | 18 h-  | 24 h-  | 30 h-  | 36 h-  | 42 h-  | 48 h- |  |
|-------|--------|--------|--------|--------|--------|--------|--------|--------|--------|--------|--------|--------|--------|--------|--------|--------|--------|--------|-------|--|
| 0 h   |        |        |        |        |        |        |        |        |        |        |        |        |        |        |        |        |        |        |       |  |
| 3 h+  | 0.6473 |        |        |        |        |        |        |        |        |        |        |        |        |        |        |        |        |        |       |  |
| 6 h+  | 0.4188 | 0.8637 |        |        |        |        |        |        |        |        |        |        |        |        |        |        |        |        |       |  |
| 12 h+ | 0.0488 | 0.2812 | 0.5455 |        |        |        |        |        |        |        |        |        |        |        |        |        |        |        |       |  |
| 18 h+ | 0.0924 | 0.0169 | 0.0088 | 0.3638 |        |        |        |        |        |        |        |        |        |        |        |        |        |        |       |  |
| 24 h+ | 0.0733 | 0.2273 | 0.1961 | 0.0384 | 0.1831 |        |        |        |        |        |        |        |        |        |        |        |        |        |       |  |
| 30 h+ | 0.1541 | 0.0042 | 0.0145 | 0.1415 | 0.0753 | 0.2540 |        |        |        |        |        |        |        |        |        |        |        |        |       |  |
| 36 h+ | 0.7558 | 0.5164 | 0.2568 | 0.0018 | 0.1871 | 0.0336 | 0.3803 |        |        |        |        |        |        |        |        |        |        |        |       |  |
| 42 h+ | 0.6160 | 0.9464 | 0.8836 | 0.3350 | 0.0091 | 0.2058 | 0.0036 | 0.4972 |        |        |        |        |        |        |        |        |        |        |       |  |
| 48 h+ | 0.1709 | 0.4786 | 0.7582 | 0.8586 | 0.1647 | 0.0963 | 0.0894 | 0.0475 | 0.5584 |        |        |        |        |        |        |        |        |        |       |  |
| 3 h-  | 0.6895 | 0.8805 | 0.6718 | 0.1811 | 0.0467 | 0.2005 | 0.0207 | 0.6154 | 0.8667 | 0.3350 |        |        |        |        |        |        |        |        |       |  |
| 6 h-  | 0.5440 | 0.8110 | 0.7292 | 0.2873 | 0.0038 | 0.1673 | 0.0016 | 0.4388 | 0.8395 | 0.4438 | 0.8443 |        |        |        |        |        |        |        |       |  |
| 12 h- | 0.3176 | 0.6241 | 0.7088 | 0.4522 | 0.0141 | 0.1212 | 0.0185 | 0.2012 | 0.6817 | 0.5690 | 0.6139 | 0.8490 |        |        |        |        |        |        |       |  |
| 18 h- | 0.2538 | 0.6068 | 0.7942 | 0.6521 | 0.0725 | 0.1065 | 0.0514 | 0.1148 | 0.6477 | 0.7501 | 0.5142 | 0.6978 | 0.8562 |        |        |        |        |        |       |  |
| 24 h- | 0.1232 | 0.3407 | 0.5139 | 0.6394 | 0.1496 | 0.0358 | 0.0600 | 0.0437 | 0.4021 | 0.6321 | 0.3187 | 0.5495 | 0.7856 | 0.8321 |        |        |        |        |       |  |
| 30 h- | 0.0435 | 0.2270 | 0.4345 | 0.8136 | 0.3534 | 0.0152 | 0.1137 | 0.0013 | 0.2704 | 0.7038 | 0.1719 | 0.3244 | 0.5292 | 0.7274 | 0.8165 |        |        |        |       |  |
| 36 h- | 0.0007 | 0.0680 | 0.2074 | 0.6796 | 0.6035 | 0.0065 | 0.1029 | 0.0198 | 0.0902 | 0.4938 | 0.0419 | 0.1384 | 0.2934 | 0.4563 | 0.6215 | 0.8570 |        |        |       |  |
| 42 h- | 0.0091 | 0.0020 | 0.0390 | 0.3117 | 0.5475 | 0.0964 | 0.0302 | 0.0411 | 0.0062 | 0.1751 | 0.0009 | 0.0643 | 0.1879 | 0.2180 | 0.4651 | 0.5065 | 0.7254 |        |       |  |
| 48 h- | 0.0533 | 0.0250 | 0.0001 | 0.2027 | 0.6611 | 0.2275 | 0.0258 | 0.1218 | 0.0138 | 0.0780 | 0.0182 | 0.0005 | 0.0243 | 0.0618 | 0.1902 | 0.3164 | 0.5756 | 0.6750 |       |  |

Yellow: best correlation between fed control samples; green: worst correlation between fed control sample; turquoise: best correlation between fed and starved samples; pink: worst correlation between fed and starved samples; orange: best correlation between starved samples; purple: worst correlation between starved samples; gray: point at which gene expression starts to deviate significantly between fed and starved sample.

## Other Supporting Information Files

- [Dataset S1 \(XLS\)](#)
- [Dataset S2 \(XLSX\)](#)
- [Dataset S3 \(XLS\)](#)
